# Supplementary material for: A novel substitution -sensing for hydroquinone and catechol based on a poly(3-aminophenylboronic acid)/MWCNTs modified electrode
Source: Royal Society of Chemistry journal article supplement (doi:10.1039/c5an01112d), 2015-01-01
Supplement: c5an01112d1.pdf [file c5an01112d1.pdf]

## Electronic supplementary material

### **A novel substitution sensing for hydroquinone and catechol based on Poly(3-aminophenylboronic acid)/MWCNTs modified electrode**

Min Zhong, Yunlong Dai, Limei Fan, Xiaojing Lu, Xianwen Kan\*

Table S1 Comparison with other sensors for the determination of **CC**.

| Method                                                                                                                   | Calibration range (mol/L)                         | Detection limit (mol/L) | References |
|--------------------------------------------------------------------------------------------------------------------------|---------------------------------------------------|-------------------------|------------|
| A sensor based on as-grown and nanograss array BDD electrode                                                             | $5.0 \times 10^{-6}$<br>$\sim 1.0 \times 10^{-4}$ | $1.3 \times 10^{-6}$    | [1]        |
| A GCE modified with multi-walled carbon nanotubes                                                                        | $2.0 \times 10^{-5}$<br>$\sim 1.2 \times 10^{-3}$ | $1.0 \times 10^{-5}$    | [2]        |
| A CNCs-RGO/GCE                                                                                                           | $1.0 \times 10^{-6}$<br>$\sim 4.0 \times 10^{-4}$ | $4.0 \times 10^{-7}$    | [3]        |
| A laccase biosensor based on AgNPs-CMC/cellulose composite nanofibrous mats                                              | $5.0 \times 10^{-6}$<br>$\sim 3.7 \times 10^{-3}$ | $1.6 \times 10^{-6}$    | [4]        |
| A screen-printed prussian blue modified electrode                                                                        | $1.0 \times 10^{-6}$<br>$\sim 9.0 \times 10^{-5}$ | $4.3 \times 10^{-7}$    | [5]        |
| A nanotubes/carbon paper composite electrochemical sensor                                                                | $1.0 \times 10^{-6}$<br>$\sim 1.0 \times 10^{-4}$ | $2.9 \times 10^{-7}$    | [6]        |
| A BphC/GCE constructed by polyvinyl alcohol/SiO <sub>2</sub> sol-gel method                                              | $2.0 \times 10^{-6}$<br>$\sim 8.0 \times 10^{-4}$ | $4.3 \times 10^{-7}$    | [7]        |
| MWCNTs-PDDA-GR/GCE                                                                                                       | $5.0 \times 10^{-7}$<br>$\sim 4.0 \times 10^{-4}$ | $1.8 \times 10^{-8}$    | [8]        |
| A photoelectrochemical sensor based on CdS quantum dots, DNA and pristine graphene nanocomposite film modified electrode | $1.0 \times 10^{-8}$<br>$\sim 1.0 \times 10^{-6}$ | $4.9 \times 10^{-9}$    | [9]        |
| pAPBA/MWCNTs/GCE                                                                                                         | $4.0 \times 10^{-8}$<br>$\sim 1.7 \times 10^{-5}$ | $4.3 \times 10^{-9}$    | This work  |

## References

- [1] M. Lv, M. Wei, F. Rong, Z.Z. Gu, C. Terashima, A. Fujishima, *Electroanalysis*, 2010, 22, 199.
- [2] Z. Xu, X. Chen, X.H. Qu, S.J. Dong, *Electroanalysis*, 2004, 16, 684.
- [3] Y.H. Huang, J.H. Chen, X. Sun, Z.B. Su, H.T. Xiang, S.R. Hu, W. Weng, H.X. Guo, W.B. Wu, Y.S. He, *Sens. Actuators. B*, 2015, 212, 165.
- [4] J.P. Fu, D.W. Li, G.H. Li, F.L. Huang, Q.F. Wei, *J. Electroanal. Chem.*, 2015, 738, 92.
- [5] M. Buleandra, A.A. Rabinca, C. Mihailciuc, *Sens. Actuators. B*, 2014, 203, 824.
- [6] X. Yue, S. Pang, P. Han, *Electrochem. Commun.*, 2013, 34, 356.
- [7] Q. Zhang, Y. Qu, X. Zhang, *Biosens. Bioelectron.*, 2011, 26, 4362.
- [8] D. Song, J. Xia, F. Zhang, S. Bi, W.J. Xiang, Z.H. Wang, *Sens. Actuators. B*, 2015, 206, 111.
- [9] Y. Liu, R. Wang, Y. Zhu, *Sens. Actuators. B*, 2015, 210, 355.

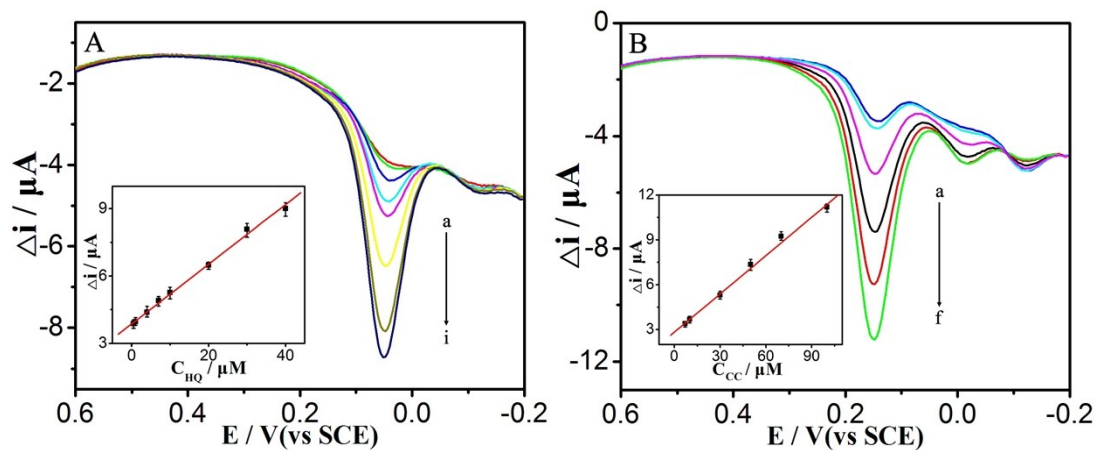

Fig. S1 (A) DPV curves of HQ recorded on pAPBA/MWCNTs/GCE with different concentration (a-i were  $5.0 \times 10^{-7}$  to  $4.0 \times 10^{-5}$  mol L<sup>-1</sup>). Inset: The calibration curve for HQ; (B) DPV curves of **CC** recorded on pAPBA/MWCNTs/GCE with different concentration (a-f were  $7.0 \times 10^{-6}$  to  $1.0 \times 10^{-4}$  mol L<sup>-1</sup>). Inset: The calibration curve for **CC**.

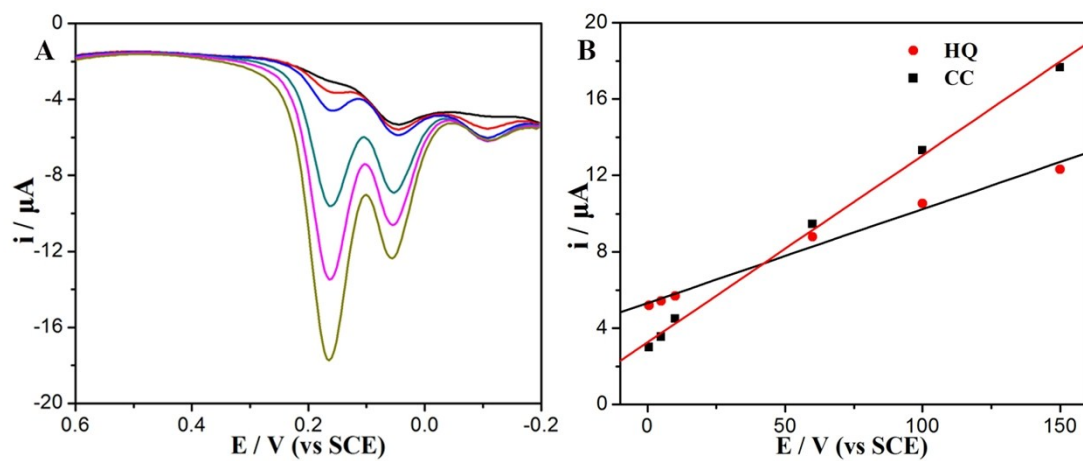

Fig. S2 (A) DPV curves of simultaneous detection of HQ and CC on pAPBA/MWCNTs/GCE with different concentration of HQ and CC (Concentrations were  $5.0 \times 10^{-7}$  to  $1.5 \times 10^{-5}$  mol L<sup>-1</sup>). (B) The calibration curve for HQ and CC.

Table S2 Application of the sensor to competitively determine CC in five kinds of real water samples spiked with different amounts of CC.

| Samples                | Added<br>( $\mu\text{M}$ ) | Founded*<br>( $\mu\text{M}$ ) | Recovery<br>(%) |
|------------------------|----------------------------|-------------------------------|-----------------|
| Tap Water              | 0.5                        | 0.475                         | 95.0            |
|                        | 5                          | 5.18                          | 103.6           |
|                        | 10                         | 10.2                          | 102.0           |
| Jinghu Lake Water      | 0.5                        | 0.522                         | 104.0           |
|                        | 5                          | 5.26                          | 105.3           |
|                        | 10                         | 9.85                          | 98.5            |
| Wenjin Lake Water      | 0.5                        | 0.476                         | 95.1            |
|                        | 5                          | 5.39                          | 107.9           |
|                        | 10                         | 10.1                          | 101.0           |
| Changjiang River Water | 0.5                        | 0.515                         | 103.0           |
|                        | 5                          | 5.41                          | 108.2           |
|                        | 10                         | 9.78                          | 97.8            |
| Sanitary Wastewater    | 0.5                        | 0.490                         | 98.0            |
|                        | 5                          | 4.95                          | 99.0            |
|                        | 10                         | 9.91                          | 99.1            |

\* Average value of three determination
